# Supplementary material for: Heterogeneous Trajectory Classes of Social Engagement and Sex Differences for Older Adults in China
Source: PubMed Central journal article supplement (PMC7696123; doi:10.3390/ijerph17228322), 2020-11-11
Supplement: ijerph-17-08322-s001.pdf [file ijerph-17-08322-s001.pdf]

## Supplementary material

**Supplementary Table 1.** Missing Observations for Social Engagement in Each Wave and Baseline Variables.

| <b>Variables.</b>                       | <b>n</b> | <b>%</b> |
|-----------------------------------------|----------|----------|
| <b>Social engagement</b>                |          |          |
| Wave 1                                  | 2        | 0.0      |
| Wave 2                                  | 7913     | 49.3     |
| Wave 3                                  | 11875    | 73.9     |
| Wave 4                                  | 13649    | 85.0     |
| Wave 5                                  | 14500    | 90.3     |
| Wave 6                                  | 15347    | 95.5     |
| <b>Sociodemographic characteristics</b> |          |          |
| Age                                     | 0        | -        |
| Sex                                     | 0        | -        |
| Ethnicity                               | 0        | -        |
| Occupational status                     | 0        | -        |
| Education years                         | 105      | 0.7      |
| Residence                               | 0        |          |
| Region                                  | 0        |          |
| Sufficient financial support            | 5        |          |
| Pension                                 | 13       | 0.1      |
| <b>Health status</b>                    |          |          |
| ADL (0-6)                               | 50       | 0.3      |
| Chronic diseases numbers (0-11)         | 1646     | 10.2     |
| MMSE score (0-30)                       | 9        | 0.1      |
| Positive emotions (0-12)                | 1954     | 12.2     |

Note. n=16064. Baseline year=2002.

**Supplementary Table 2.** Comparison of Baseline Variables between Analytical Sample and Drop-out Sample.

| Variables.                              | Univariable logistic |         | Multivariable logistic |         |
|-----------------------------------------|----------------------|---------|------------------------|---------|
|                                         | OR                   | p value | OR                     | p value |
| Social engagement                       | 1.48                 | <.001   | 1.11                   | <.001   |
| <b>Sociodemographic characteristics</b> |                      |         |                        |         |
| Age                                     |                      |         |                        |         |
| 65-74                                   | Ref.                 | -       | Ref.                   | -       |
| 75-84                                   | 0.56                 | <.001   | 0.68                   | <.001   |
| 85+                                     | 0.16                 | <.001   | 0.30                   | <.001   |
| Sex                                     |                      |         |                        |         |
| Woman                                   | Ref.                 | -       | Ref.                   | -       |
| Man                                     | 1.24                 | <.001   | 0.85                   | <.001   |
| Ethnicity                               |                      |         |                        |         |
| Minority                                | Ref.                 | -       | Ref.                   | -       |
| Han                                     | 0.74                 | <.001   | 0.89                   | 0.193   |
| Occupational status                     |                      |         |                        |         |
| Low level                               | Ref.                 | -       | Ref.                   | -       |
| High level                              | 1.38                 | <.001   | 1.06                   | 0.458   |
| Education years                         |                      |         |                        |         |
| 0                                       | Ref.                 | -       | Ref.                   | -       |
| 1-5                                     | 1.38                 | <.001   | 0.97                   | 0.537   |
| 6-9                                     | 1.64                 | <.001   | 1.01                   | 0.913   |
| 10+                                     | 1.35                 | <.001   | 0.89                   | 0.283   |
| Residence                               |                      |         |                        |         |
| Rural                                   | Ref.                 | -       | Ref.                   | -       |
| Urban                                   | 0.84                 | <.001   | 0.85                   | <.001   |
| Region                                  |                      |         |                        |         |
| Eastern China                           | Ref.                 | -       | Ref.                   | -       |
| Central China                           | 0.80                 | <.001   | 0.88                   | 0.029   |
| Western China                           | 0.67                 | <.001   | 0.69                   | <.001   |
| Sufficient financial support            |                      |         |                        |         |
| No                                      | Ref.                 | -       | Ref.                   | -       |
| Yes                                     | 1.01                 | 0.866   | 0.96                   | 0.436   |
| Pension                                 |                      |         |                        |         |
| No                                      | Ref.                 | -       | Ref.                   | -       |
| Yes                                     | 1.27                 | <.001   | 0.89                   | 0.047   |
| <b>Health status</b>                    |                      |         |                        |         |
| ADL (0-6)                               | 0.60                 | <.001   | 0.75                   | <.001   |
| Chronic diseases numbers (0-11)         | 0.97                 | 0.225   | 0.93                   | 0.012   |
| MMSE score (0-30)                       | 1.09                 | <.001   | 1.04                   | <.001   |
| Positive emotions (0-12)                | 1.10                 | <.001   | 1.03                   | <.001   |

Note. OR= odds ratio; Ref.=reference. The numbers of analytical sample and drop-out sample were 8117 and 7947, respectively. Univariable and multivariable logistic models were used, and the drop-out sample was set as the reference. Baseline year=2002.

**Supplementary Table 3.** Marital Status of Older Adults between Three Age Groups.

| <i>Variables.</i> | Total (n=8117) | Unmarried (n=4913) | Married (n=3204) | p value |
|-------------------|----------------|--------------------|------------------|---------|
|                   | N (%)          | N (%)              | N (%)            |         |
| Age               |                |                    |                  |         |
| 65-74             | 2530 (31.2)    | 822 (16.7)         | 1708 (53.3)      | <.001   |
| 75-84             | 2401 (29.6)    | 1398 (28.5)        | 1003 (31.3)      |         |
| 85+               | 3186 (39.3)    | 2693 (54.8)        | 493 (15.4)       |         |

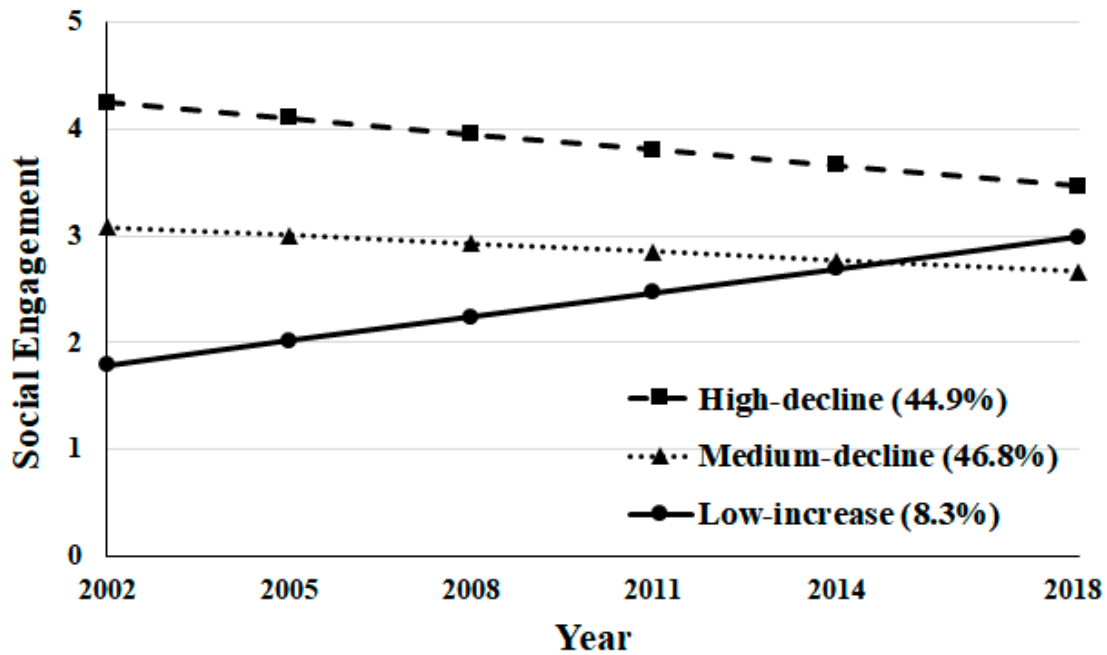

**Figure S1.** Heterogenous trajectory classes of social engagement for older adults with complete information for at least three waves (n= 4159). The three class GMM was selected as final model (sample-size adjusted Bayesian information criteria= 39327.6; entropy= 0.75; Vuong-Lo-Mendell-Rubin Likelihood Ratio Test p value< .001), including “high-decline” class (intercept= 4.25, p< .001; slope= -0.15, p<.001), “Mow-decline” class (intercept= 3.09, p<.001; slope= -0.08, p<.001), and “low-increase” class (intercept= 1.79, p< .001; slope= 0.23, p<.001). It showed similar pattern of social engagement trajectory classes with our analytic sample (n= 8117).

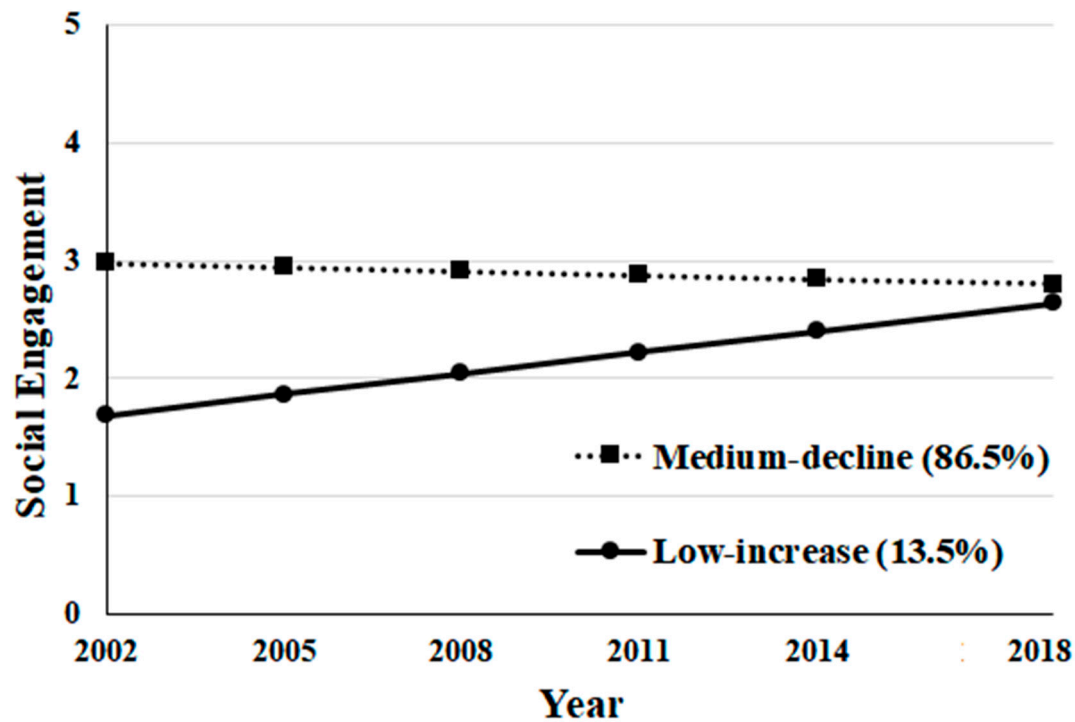

**Figure S2.** Heterogenous trajectory classes of social engagement for older adults with different definition of social engagement by excluding spouse from cohabitant or confidant ( $n= 5160$ ). The two class GMM was selected as final model (sample-size adjusted Bayesian information criteria= 26033.8; entropy= 0.80; Vuong-Lo-Mendell-Rubin Likelihood Ratio Test  $p$  value $<.001$ ), including “Medium-decline” class (intercept= 2.98,  $p<.001$ ; slope= -0.03,  $p<.001$ ) and “low-increase” class (intercept= 1.68,  $p<.001$ ; slope= 0.18,  $p<.01$ ). The “high-decline” class of social engagement trajectory in original sample was not identified here. Compared to exclude spouse from cohabitant or confidant in this definition of social engagement, married people who were more dependent on their spouse may had higher level of social engagement than others in our original definition. However, two classes of change patterns (declining and increasing) of social engagement still existed.
